# Supplementary material for: Complex Tannins Isolated from Jelly Fig Achenes Affect Pectin Gelation through Non-Specific Inhibitory Effect on Pectin Methylesterase
Source: MDPI journal article supplement (doi:10.3390/molecules24081601), 2019-04-23
Supplement: s1 [file s1]

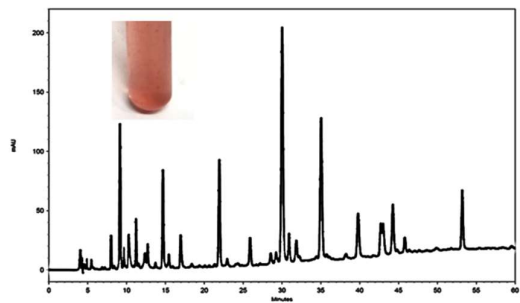

**Figure S1.** Chromatographic profiles and appearance of acid hydrolysis resultant (1 N HCl, 121 °C for 30 min) of *SPEI*'s acetone-soluble fraction (ASfr). *SPEI*, substances with pectin methylesterase inhibitory activity.
